# Supplementary material for: Photon management through titania architecture engineering in organic dye–Cu electrolyte dye sensitized solar cells
Source: Royal Society of Chemistry journal article supplement (doi:10.1039/d5nj03088a), 2025-01-01
Supplement: d5nj03088a1.pdf [file d5nj03088a1.pdf]

## Supporting Information

### Photon Management through Titania Architecture Engineering in Organic Dye-Cu Electrolyte Dye Sensitized Solar Cells

Aneesha V P<sup>a,b</sup>, Manikandan M<sup>c,d</sup>, K I Suresh<sup>b,d,e</sup>, Suraj Soman<sup>\*c,d</sup>, P Sujatha Devi<sup>\*a,b,d</sup>

<sup>a</sup> Chemical Sciences and Technology Division, CSIR-National Institute for Interdisciplinary Science and Technology, Thiruvananthapuram-695019, Kerala, India.

<sup>b</sup> Research Centre, University of Kerala, Thiruvananthapuram-695034, Kerala, India.

<sup>c</sup> Centre for Sustainable Energy Technologies (C-SET), CSIR-National Institute for Interdisciplinary Science and Technology, Thiruvananthapuram-695019 Kerala, India.

<sup>d</sup> Academy of Scientific and Innovative Research (AcSIR), Ghaziabad-201002, India.

<sup>e</sup> Materials Science and Technology Division, CSIR-National Institute for Interdisciplinary Science and Technology, Thiruvananthapuram-695019 Kerala, India.

Email: [psujathadeviniist@gmail.com](mailto:psujathadeviniist@gmail.com) ; [psujathadevi@gmail.com](mailto:psujathadevi@gmail.com) (P Sujatha Devi);  
[suraj@niist.res.in](mailto:suraj@niist.res.in) (Suraj Soman)

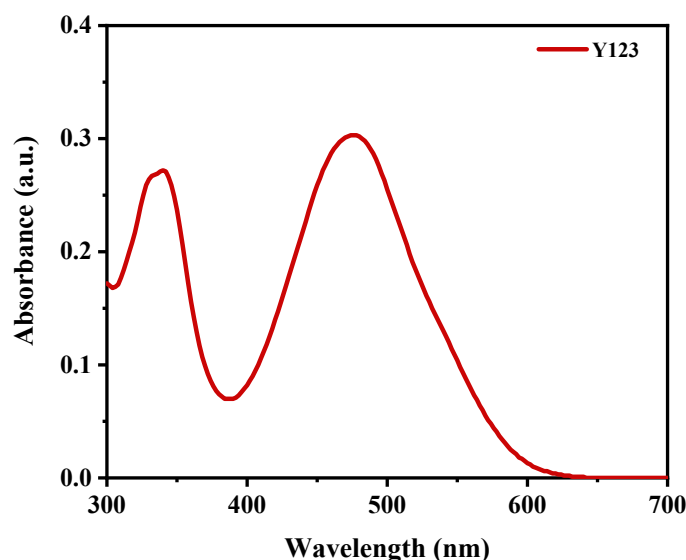

Fig. S1 UV-Vis absorption of Y123 dye.

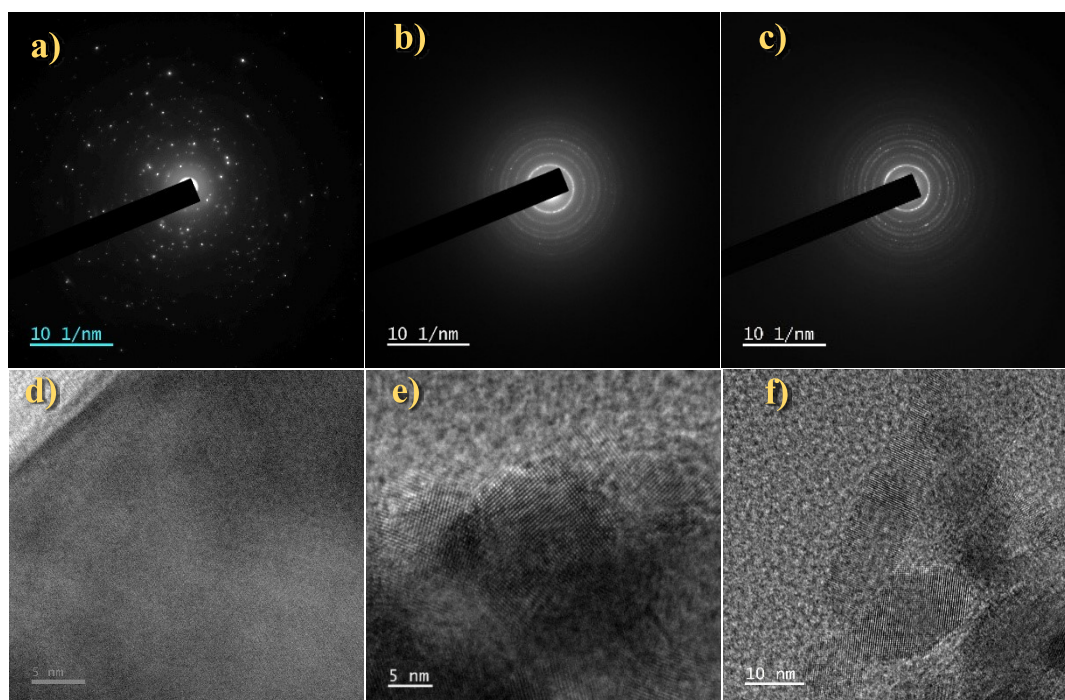

Fig. S2 SAED of a) TS, b) TF and c) TNF; HRTEM images of d) TS, e) TF and f) TNF.

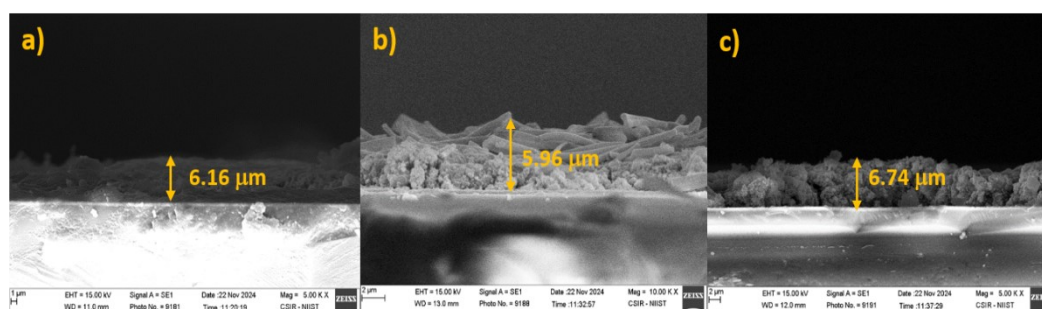

Fig. S3 Cross sectional SEM images of a) TS, b) TF and c) TNF.

## Section S1

### Dye adsorption study

The dye loading studies were carried out using a UV-Visible spectrometer (Shimadzu model 2100) as described below. A dye stock solution was prepared by dissolving 0.01 mM of the dye in a 1:1 mixture of acetonitrile and tert-butanol, and is divided into two equal portions solution 1 and solution 2. The photoanode films of interest is immersed in the dye solution 2 for 16 hours. After 16 hours, this dye solution was retrieved. The films were washed with 1 mL of acetonitrile to remove the weakly adsorbed dye and is also added to the retrieved dye solution 2. The same amount of acetonitrile is added to solution 1 to compensate for the variation in concentration. The UV-visible absorption spectra of both solutions 1 and 2 are recorded.

Finally, the amount of dye adsorbed per unit area ( $\text{mol}/\text{cm}^2$ ) of the mesoporous layer is estimated as,

$$\text{dye loading} = \frac{(\text{abs1} - \text{abs2}) V}{\epsilon s l}$$

abs 1 and abs 2 are the absorbance maximum of solution 1 and 2 respectively, V is the volume of the solution,  $\epsilon$  is the molar extinction coefficient of the dye, s is the photoanode's active area, and l is the path length of the incident light in the solution.

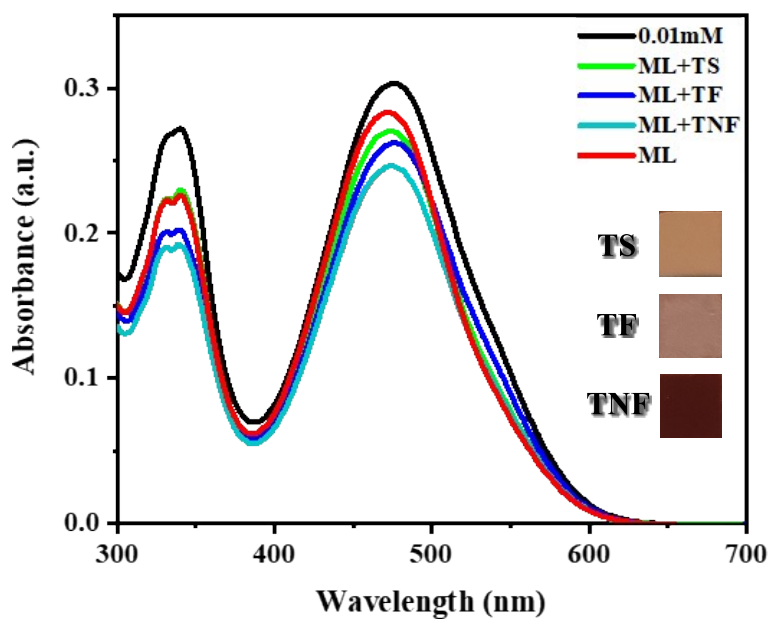

Fig. S4 Dye adsorption study- absorbance of dye solution after soaking corresponding films; inset shows the dye adsorbed films.

| Sample | Efficiency ( $\eta$ )<br>% | Dye loading (D)<br>$\text{mol.cm}^{-2}$ | $\eta/D$<br>$\%.\text{cm}^2.\text{mol}^{-1}$ |
|--------|----------------------------|-----------------------------------------|----------------------------------------------|
| TS     | 5.26                       | $3.49 \times 10^{-9}$                   | $1.51 \times 10^9$                           |
| TF     | 4.59                       | $5.86 \times 10^{-9}$                   | $0.78 \times 10^9$                           |
| TNF    | 4.49                       | $1.07 \times 10^{-8}$                   | $0.42 \times 10^9$                           |

**Table S1.** Photovoltaic efficiency ( $\eta$ ), dye loading (D), and normalized efficiency ( $\eta/D$ ) for TS, TF, and TNF electrodes under 1 sun (AM 1.5G).

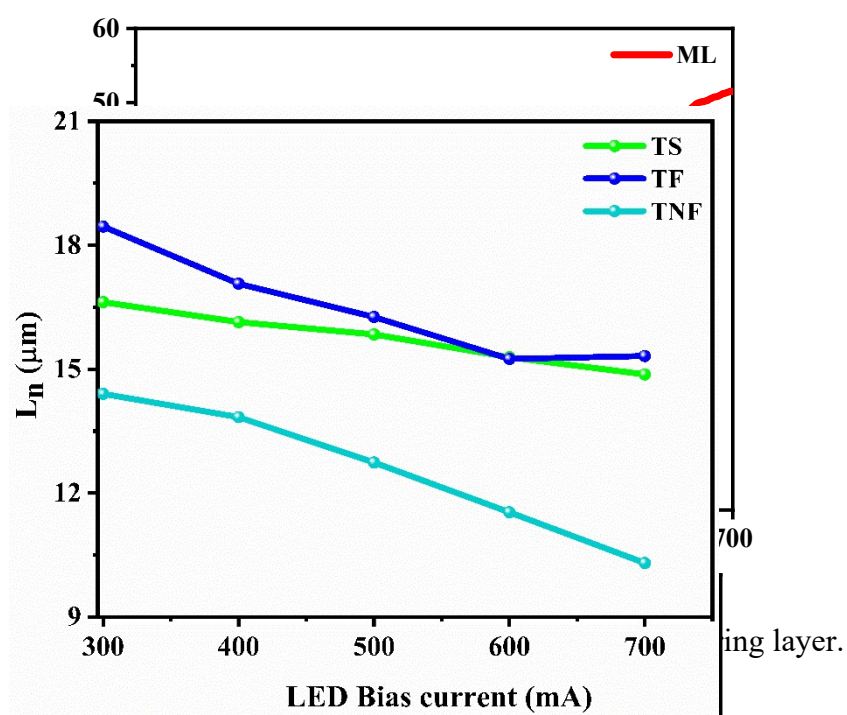

Fig. S6 Diffusion length of devices with TS, TF, and TNF.

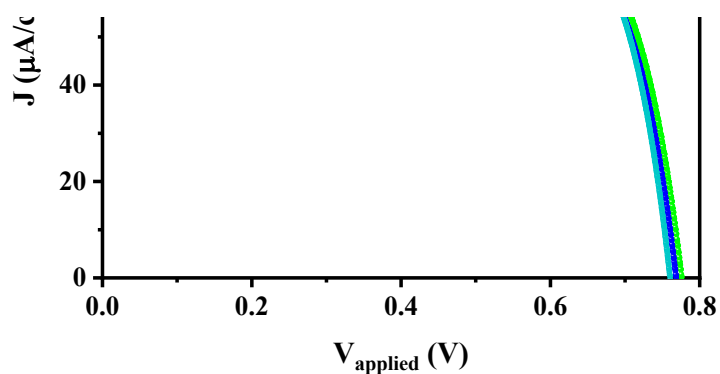

Fig. S7 Photocurrent -Voltage characteristics of devices under 1000 lux WWCFL condition.
